# Supplementary material for: Risk Estimation of Cardiovascular Disease in Qatar’s Primary Care Settings: Application of QRISK3 Algorithm and Sociodemographic Predictors
Source: Research Square preprint supplement (doi:10.21203/rs.3.rs-8608190/v1), 2026-02-11
Supplement: Supplementary file 1 [file 40adc787087416e34141e75b.docx]

**SUPPLEMENTARY FILE**

This appendix has been provided by the authors to give readers additional information about their study.

Supplement to: Risk estimation of cardiovascular disease in Qatar’s primary care settings

**Table S1: Nationality categories**

| **Region** | **Country** |
| --- | --- |
| Northern Africa | | Algeria | | --- | | Egypt | | Libya | | Morocco | | Sudan | | Tunisia | | Western Sahara | |
| Sub-Saharan Africa | | British Indian Ocean Territory | | --- | | Burundi | | Comoros | | Djibouti | | Eritrea | | Ethiopia | | French Southern Territories | | Kenya | | Madagascar | | Malawi | | Mauritius | | Mayotte | | Mozambique | | Réunion | | Rwanda | | Seychelles | | Somalia | | South Sudan | | Uganda | | United Republic of Tanzania | | Zambia | | Zimbabwe | | Angola | | Cameroon | | Central African Republic | | Chad | | Congo | | Democratic Republic of the Congo | | Equatorial Guinea | | Gabon | | Sao Tome and Principe | | Botswana | | Eswatini | | Lesotho | | Namibia | | South Africa | | Benin | | Burkina Faso | | Cabo Verde | | Côte d’Ivoire | | Gambia | | Ghana | | Guinea | | Guinea-Bissau | | Liberia | | Mali | | Mauritania | | Niger | | Nigeria | | Saint Helena | | Senegal | | Sierra Leone | | Togo | |
| Latin America and the Caribbean | | Anguilla | | --- | | Antigua and Barbuda | | Aruba | | Bahamas | | Barbados | | Bonaire, Sint Eustatius and Saba | | British Virgin Islands | | Cayman Islands | | Cuba | | Curaçao | | Dominica | | Dominican Republic | | Grenada | | Guadeloupe | | Haiti | | Jamaica | | Martinique | | Montserrat | | Puerto Rico | | Saint Barthélemy | | Saint Kitts and Nevis | | Saint Lucia | | Saint Martin (French Part) | | Saint Vincent and the Grenadines | | Sint Maarten (Dutch part) | | Trinidad and Tobago | | Turks and Caicos Islands | | United States Virgin Islands | | Belize | | Costa Rica | | El Salvador | | Guatemala | | Honduras | | Mexico | | Nicaragua | | Panama | | South America | | Argentina | | Bolivia (Plurinational State of) | | Bouvet Island | | Brazil | | Chile | | Colombia | | Ecuador | | Falkland Islands (Malvinas) | | French Guiana | | Guyana | | Paraguay | | Peru | | South Georgia and the South Sandwich Islands | | Suriname | | Uruguay | | Venezuela (Bolivarian Republic of) | |
| Northern America | | Bermuda | | --- | | Canada | | Greenland | | Saint Pierre and Miquelon | | United States of America | | Antarctica | |
| Eastern-Central Asia | | Kazakhstan | | --- | | Kyrgyzstan | | Tajikistan | | Turkmenistan | | Uzbekistan | | China | | China, Hong Kong Special Administrative Region | | China, Macao Special Administrative Region | | Democratic People's Republic of Korea | | Japan | | Mongolia | | Republic of Korea | |
| South-eastern Asia | | Brunei Darussalam | | --- | | Cambodia | | Indonesia | | Lao People's Democratic Republic | | Malaysia | | Myanmar | | Philippines | | Singapore | | Thailand | | Timor-Leste | | Viet Nam | |
| Southern Asia | | Afghanistan | | --- | | Bangladesh | | Bhutan | | India | | Iran (Islamic Republic of) | | Maldives | | Nepal | | Pakistan | | Sri Lanka | |
| Western Asia (excluding Qatar) | | Armenia | | --- | | Azerbaijan | | Bahrain | | Cyprus | | Georgia | | Iraq | | Israel | | Jordan | | Kuwait | | Lebanon | | Oman | | Saudi Arabia | | State of Palestine | | Syrian Arab Republic | | Turkey | | United Arab Emirates | | Yemen | |
| Eastern Europe | | Belarus | | --- | | Bulgaria | | Czechia | | Hungary | | Poland | | Republic of Moldova | | Romania | | Russian Federation | | Slovakia | | Ukraine | |
| Northern Europe | | Åland Islands | | --- | | Channel Islands | | Guernsey | | Jersey | | Sark | | Denmark | | Estonia | | Faroe Islands | | Finland | | Iceland | | Ireland | | Isle of Man | | Latvia | | Lithuania | | Norway | | Svalbard and Jan Mayen Islands | | Sweden | | United Kingdom of Great Britain and Northern Ireland | |
| Southern Europe | | Albania | | --- | | Andorra | | Bosnia and Herzegovina | | Croatia | | Gibraltar | | Greece | | Holy See | | Italy | | Malta | | Montenegro | | Portugal | | San Marino | | Serbia | | Slovenia | | Spain | | The former Yugoslav Republic of Macedonia | |
| Western Europe | | Austria | | --- | | Belgium | | France | | Germany | | Liechtenstein | | Luxembourg | | Monaco | | Netherlands | | Switzerland | |
| Australasia | | Australia | | --- | | Christmas Island | | Cocos (Keeling) Islands | | Heard Island and McDonald Islands | | New Zealand | | Norfolk Island | | Fiji | | New Caledonia | | Papua New Guinea | | Solomon Islands | | Vanuatu | | Guam | | Kiribati | | Marshall Islands | | Micronesia (Federated States of) | | Nauru | | Northern Mariana Islands | | Palau | | United States Minor Outlying Islands | | American Samoa | | Cook Islands | | French Polynesia | | Niue | | Pitcairn | | Samoa | | Tokelau | | Tonga | | Tuvalu | | Wallis and Futuna Islands | |

**Table S2: Population characteristics of QRISK3 eligible individuals**

| **Population characteristics** | **Eligible for QRISK3 score calculation** | |
| --- | --- | --- |
| **n** | **%** |
| **Age (years)** | | |
| 25-39 | 357 | 26.33 |
| 40-49 | 399 | 29.42 |
| 50-59 | 353 | 26.03 |
| 60-84 | 247 | 18.22 |
|  | | |
| **Gender** | | |
| Female | 626 | 46.17 |
| Male | 730 | 53.83 |
|  | | |
| **Nationality** | | |
| Qatari | 142 | 10.47 |
| Northern Africa | 391 | 28.83 |
| South-eastern Asia | 158 | 11.65 |
| Southern Asia | 138 | 10.18 |
| Western Asia | 364 | 26.84 |
| Other | 163 | 12.02 |
|  | | |
| **BMI (kg/m2)** | | |
| Average (<25) | 219 | 16.15 |
| Overweight (25-29.9) | 552 | 40.71 |
| Class 1 Obesity (30-34.9) | 396 | 29.20 |
| Class 2 Obesity (35-39.9) | 136 | 10.03 |
| Class 3 Obesity (40+) | 53 | 3.91 |
|  | | |
| **Education status** | | |
| Never attended school | 12 | 0.88 |
| Primary school (Class 1 to 6) | 40 | 2.95 |
| Secondary school (Class 7 to 12) | 233 | 17.18 |
| Trade/technical/vocational qualification | 74 | 5.46 |
| Diploma/bachelor’s degree | 753 | 55.53 |
| Post graduate degree | 238 | 17.55 |
|  | | |
| **Years of residence in Qatar** | | |
| <1 | 9 | 0.66 |
| 1 to 5 | 68 | 5.01 |
| > 5 to 10 | 252 | 18.58 |
| > 10 | 989 | 72.94 |
|  | | |
| **Average monthly household income (QAR)** | | |
| Less than 5000 | 165 | 12.17 |
| 5000 - 10000 | 359 | 26.47 |
| 11000 - 20000 | 299 | 22.05 |
| 21000 - 30000 | 131 | 9.66 |
| 31000 - 40000 | 63 | 4.65 |
| 41000 – 50000 | 35 | 2.58 |
| 51000 - 60000 | 22 | 1.62 |
| > 60000 | 42 | 3.10 |
|  | | |
| **Physically active (>150 min/week)** | | |
| No | 1071 | 78.98 |
| Yes | 285 | 21.02 |
|  | | |
| **Municipality of residence** | | |
| Al Rayyan | 493 | 36.36 |
| Al Wakra | 114 | 8.41 |
| Doha | 536 | 39.53 |
| Others (Al Dhaayen, Al Khor and Al Thakhira, Al Shamal, Al Sheehaniya, Umm Slal) | 161 | 11.87 |
